# Supplementary material
Source: PubMed Central journal article supplement (PMC9292132)
Supplement: NIHMS1536269-supplement-Supplementary_Figure_1.pdf [file NIHMS1536269-supplement-Supplementary_Figure_1.pdf]

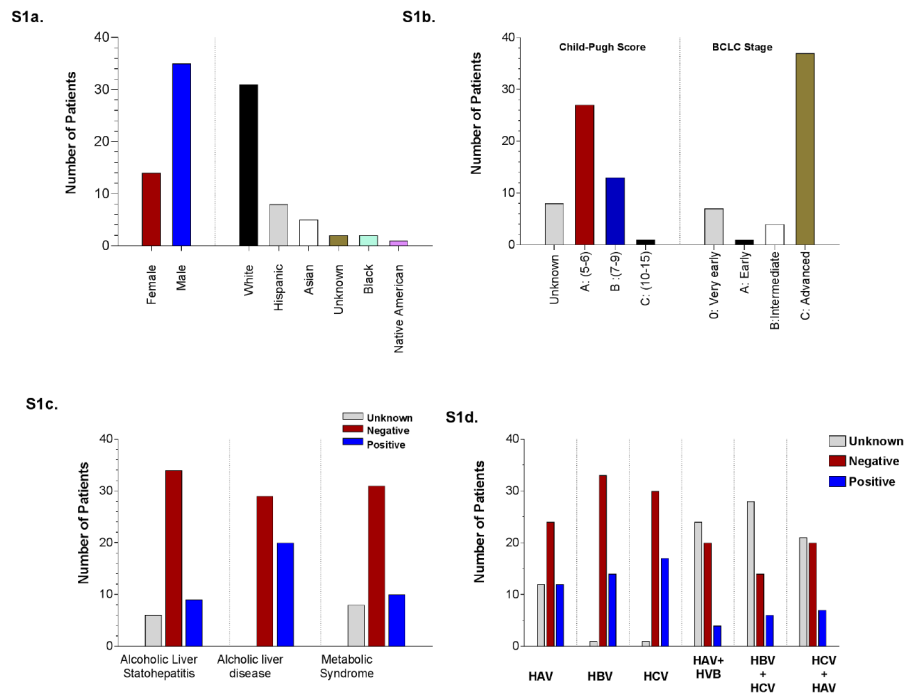

**Supplemental figure 1:** Risk factor data collected from participating institutions for the confirmed HCC patients

- a) Participation by gender and race
- b) Child-Pugh Score and BCLC stage
- c) NASH, alcoholic liver disease, metabolic syndrome
- d) Hepatitis status
