# Supplementary material
Source: PubMed Central journal article supplement (PMC9292132)
Supplement: NIHMS1536269-supplement-Supplementary_Figure_2.pdf [file NIHMS1536269-supplement-Supplementary_Figure_2.pdf]

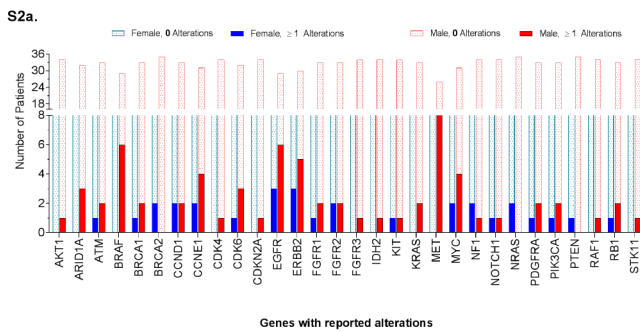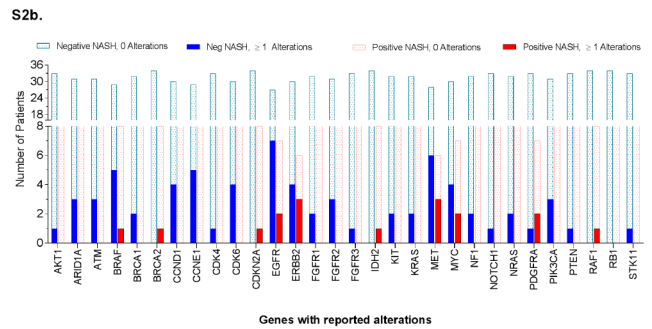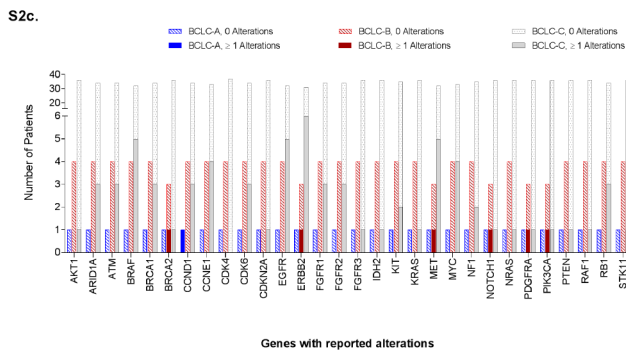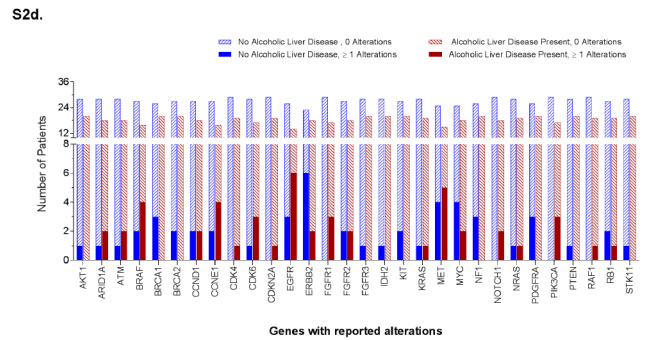

**Supplemental figure 2:** Non-significant correlations identified between molecular landscape and gender, NASH, BCLC stage

- Gender
- NASH
- BCLC
- Alcoholic liver disease
